# Supplementary material for: Repetitive and forceful movements of the hand as predictors of treatment for pain in the distal upper extremities
Source: HighWire-hosted journal article supplement (doi:10.1136/oemed-2021-107543), 2021-08-20
Supplement: oemed-2021-107543supp001_data_supplement.pdf [file oemed-2021-107543supp001_data_supplement.pdf]

Supplemental Table 1. Common work tasks during goniometric measurements in the 17 different job titles.

| Job Title              | Common work tasks during goniometric measurements                                                                                                                                                 |
|------------------------|---------------------------------------------------------------------------------------------------------------------------------------------------------------------------------------------------|
| Bricklayer             | Masonry, setting up scaffolding, making plinths for kitchen, laying stones, scratching joints, cutting blocks, sweeping, laying mortar, mixing mortar, washing masonry.                           |
| Carpenter              | Carrying plasterboard, setting up steel battens, mounting mouldings, supporting roofing sheets, nailing battens with a nail gun, screwing on roofing sheets, mounting windows.                    |
| Cleaning assistant     | Common cleaning in hospital offices, hallways and patient rooms.                                                                                                                                  |
| Construction worker    | Handling of concrete cannons, setting up of concrete elements with the help of a crane, mixed construction work.                                                                                  |
| Fork-lift operator     | Driving fork-lifts at a brewing storage, lifting pallets.                                                                                                                                         |
| Garbage collector      | Walking with containers on wheels, walking with carts, emptying sacks, throwing sacks in car, climbing in and out of car, driving, walking.                                                       |
| Gardener               | Digging soil, weeding bushes, tearing and setting steppingstones, hedge trimming, spraying, operating mini excavators, pruning, laying tiles, brushing.                                           |
| Hairdresser            | Haircuts and/or hair colouring.                                                                                                                                                                   |
| Kitchen assistant      | Scooping, portioning, arranging vegetables, making sandwiches, washing tables and floors, putting trays in carts.                                                                                 |
| Laundry worker         | Industrial laundries: Men: Rolls up tea towels, sorts washed, perhaps damp clothes from cart to cart. Women: Folds clothes, puts bundles of clothes on cart, sorts clothes by ribbons into cages. |
| Office worker          | Varied office work, not PC-work in particular.                                                                                                                                                    |
| Pig farm worker        | Washing stables with high-pressure rinsing, moving sows, feeding pigs by hand, castrating pigs, driving a tractor, insemination, vaccination, repairing plants.                                   |
| Plumber                | Install fittings, radiators, toilets, collect water pipes, change pipes, set up bearings, replace water traps, lay underfloor heating, cut pipes, drilling.                                       |
| Scaffolder             | Unloading, assembly of scaffolding, dismantling, loading car, sorting scaffolding parts, hanging things on a hoist.                                                                               |
| Smith                  | Measuring, welding, sawing iron, using hammers, cleaning slag, grinding.                                                                                                                          |
| Truck driver           | Driving. Drive cages onto trucks.                                                                                                                                                                 |
| Wood processing worker | Sanding, lifting plates on machine, programming machine, gluing, sweeping, sawing plates, vacuuming, removing plates from machine, sanding tabletops, packing plates.                             |
